# Supplementary material for: Immunomodulatory Properties of Blackberry Anthocyanins in THP-1 Derived Macrophages
Source: MDPI journal article supplement (doi:10.3390/ijms221910483), 2021-09-28
Supplement: s1 [file s1]

**Figure S1**

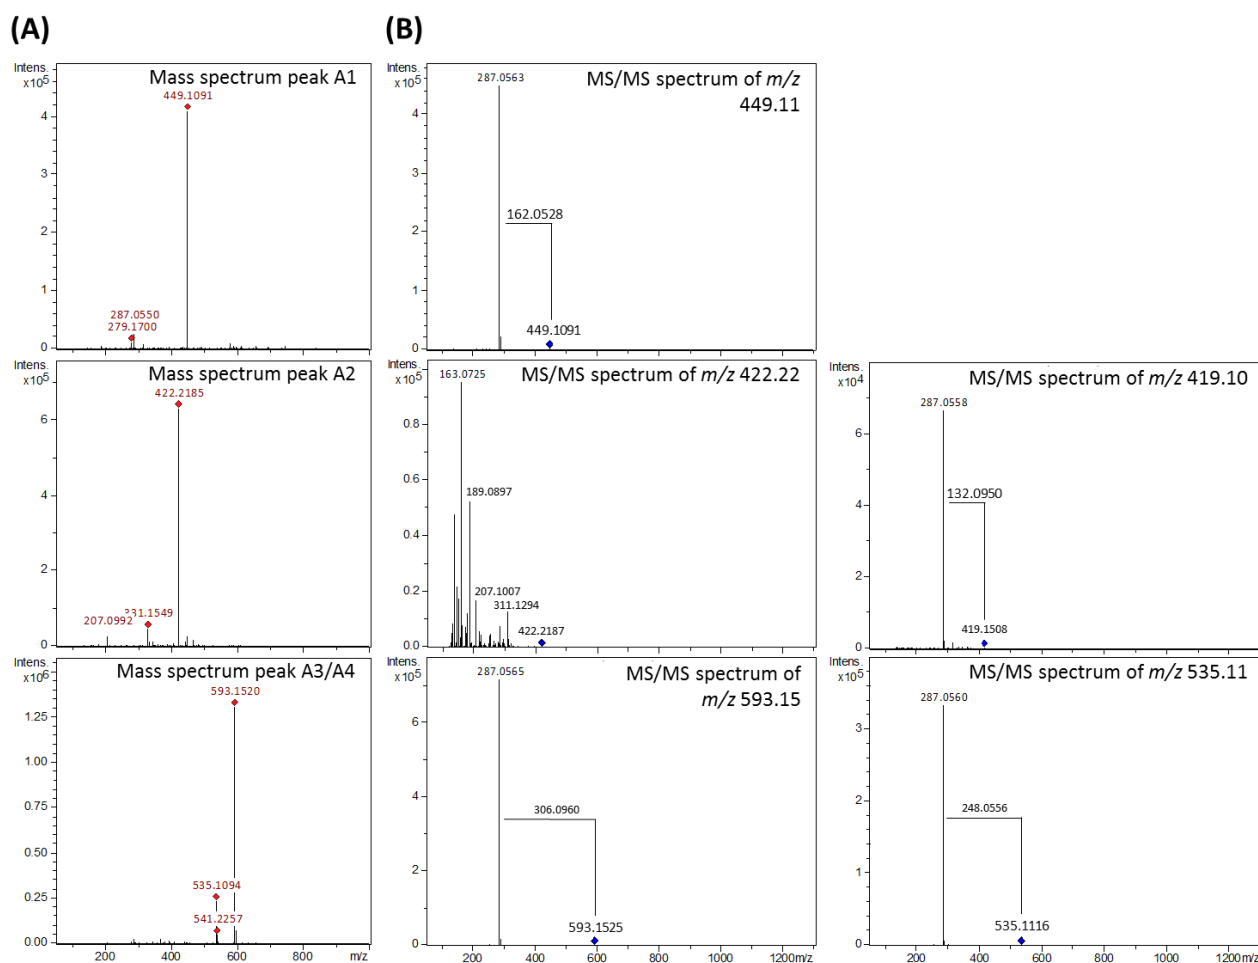

**Supplementary Figure 1:** Tentative annotation in blackberry *raw juice* based on MS/MS fragmentation pattern and comparison with literature data. **(A)** Sum of mass spectra from retention time 3.6-3.9 minutes (*anthocyanin A1*), 4.35-4.45 minutes (*anthocyanin A2* and *polyphenols PP*), and 4.9-5.0 minutes (*anthocyanin A3* and *anthocyanin A4*). **(B)** MS/MS fragmentation pattern of main molecular ions and annotation of released molecular features; n.a.: not annotated.

**Figure S2**

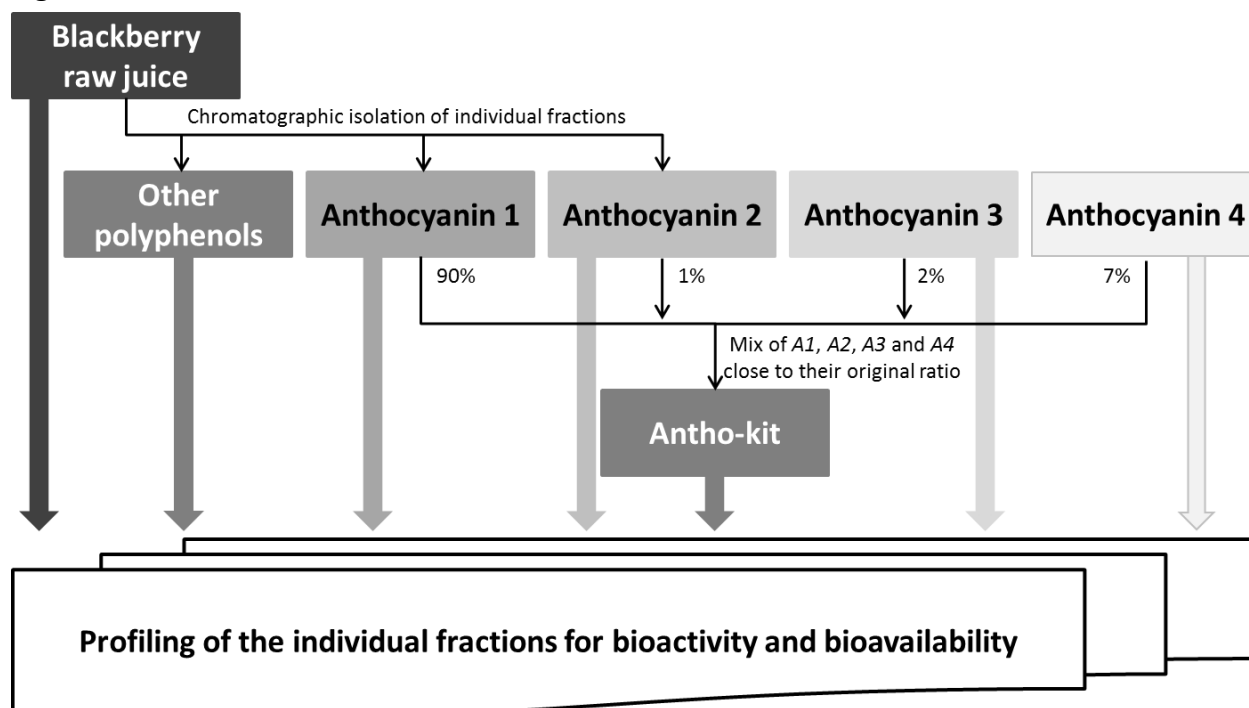

**Supplementary Figure 2:** Schematic presentation of the blackberry AnthoKit mix concept. From raw blackberry juice four individual anthocyanin fractions were isolated. Remaining material was collected as a fraction containing other polyphenols. Portions of the four anthocyanin fractions were mixed to an anthocyanin kit, based on their natural composition in the raw juice. All fractions (*raw juice*, *polyphenols*, *anthocyanin A1*, *A2*, *A3*, *A4*) and the mix were utilized in the bioactivity tests individually.

**Figure S3**

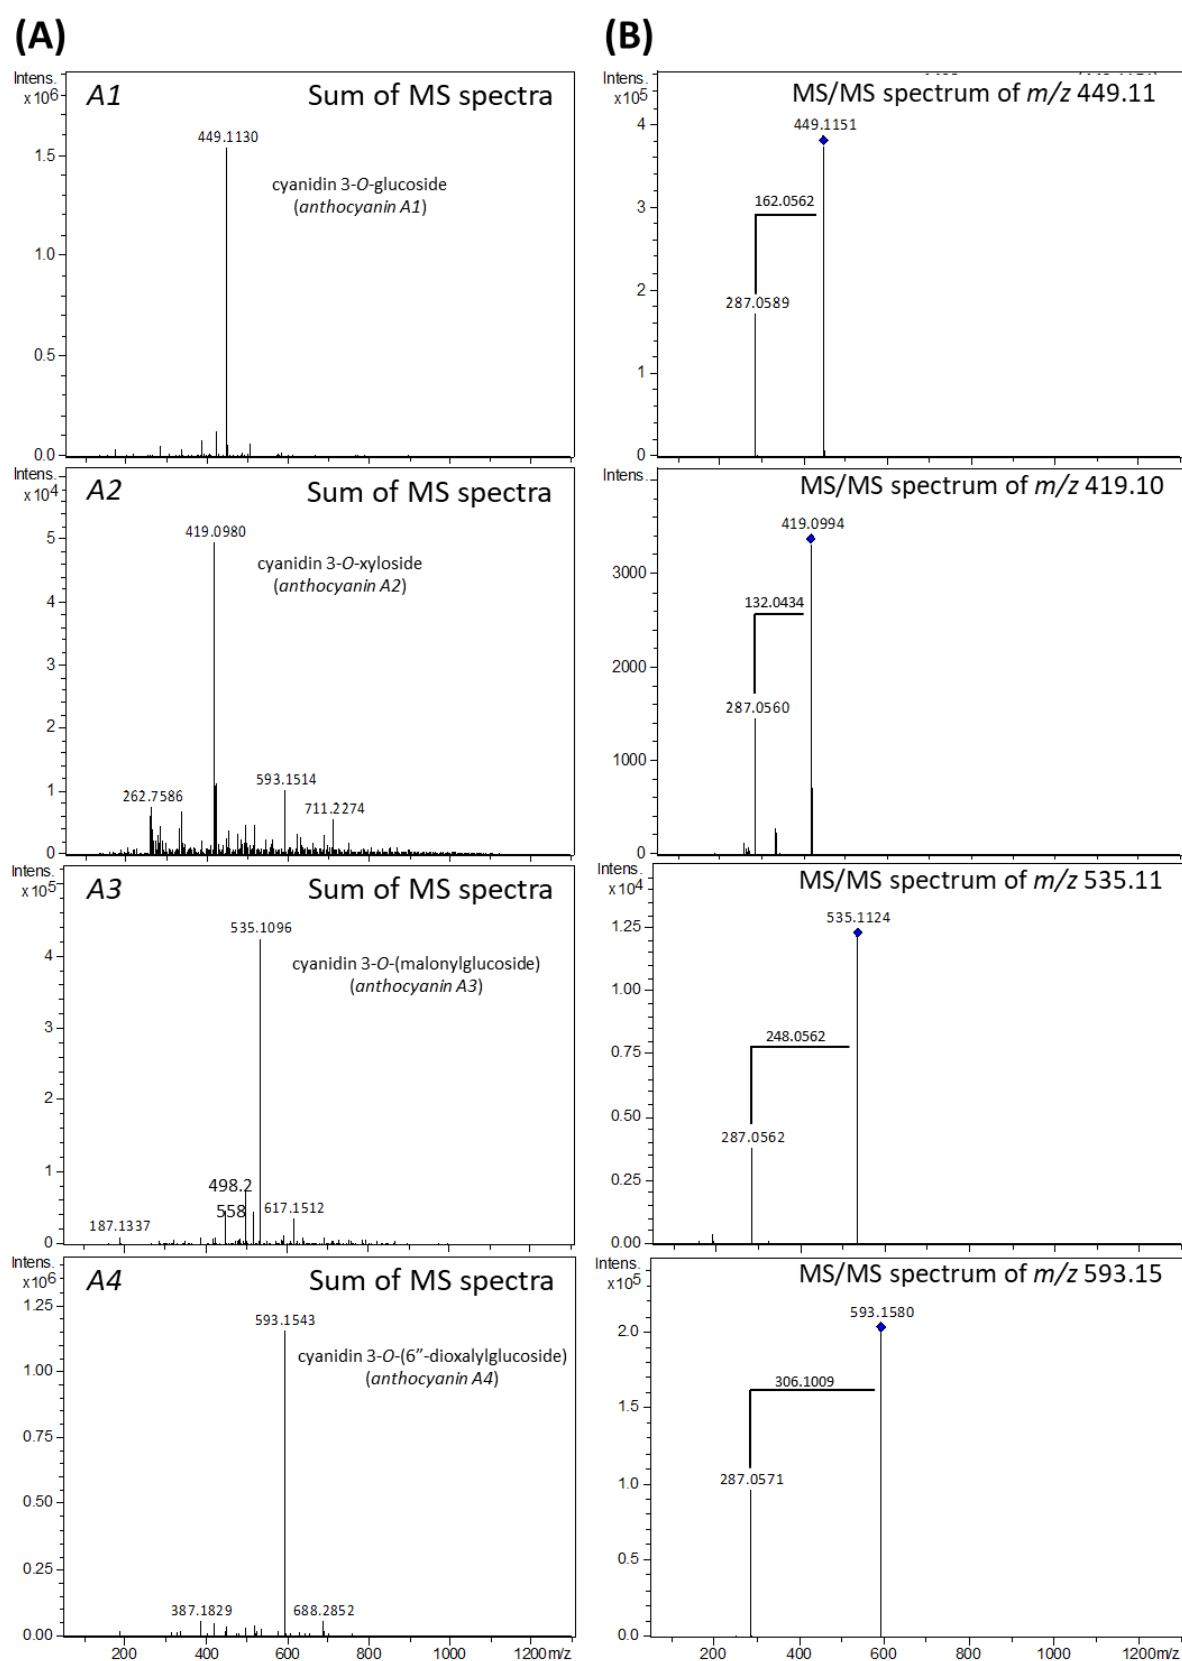

**Supplementary Figure 3:** Tentative annotation in isolated anthocyanin fractions based on MS/MS fragmentation pattern and comparison with literature data. **(A)** Sum of mass spectra of fraction *anthocyanin A1*, *A2*, *A3* and *A4*. **(B)** MS/MS fragmentation pattern of main molecular ions and annotation of released molecular features; n.a.: not annotated.

**Figure S4**

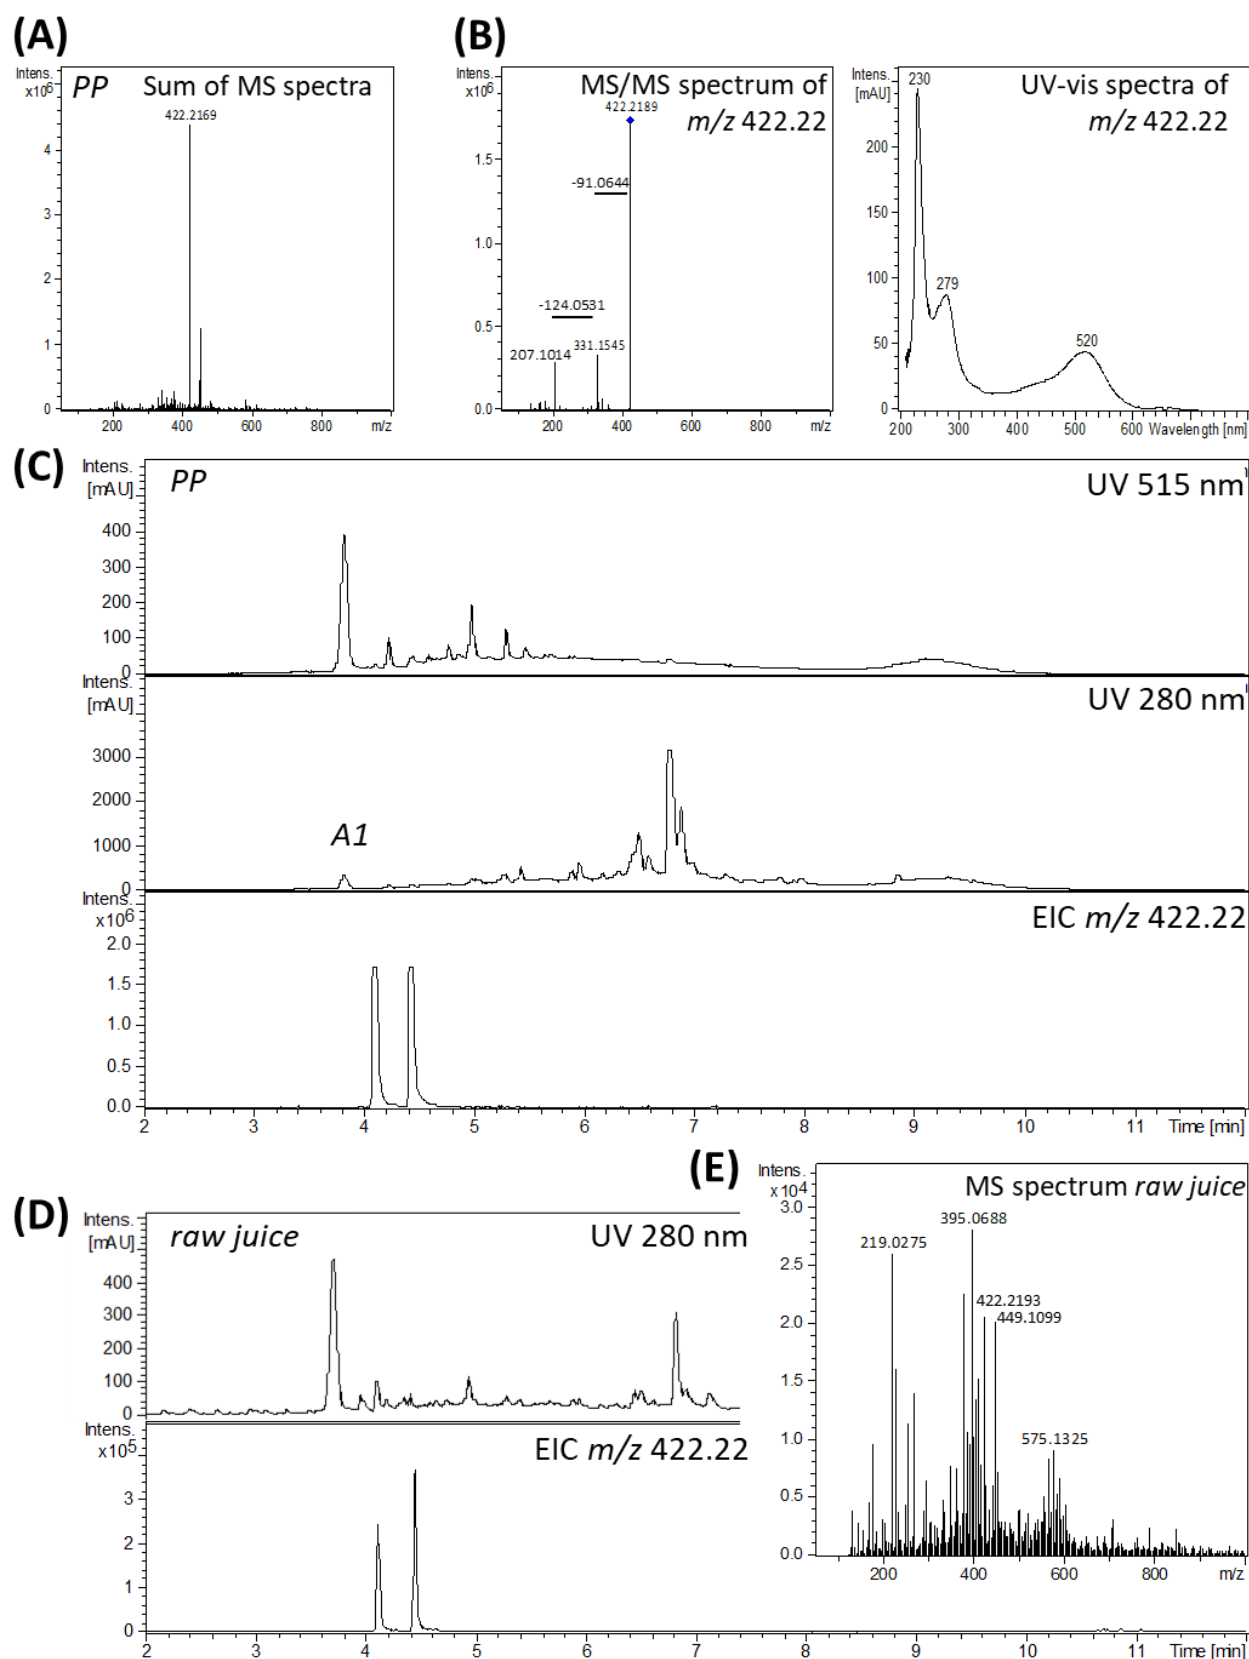

**Supplementary Figure 4: LC-UV/MS analysis of blackberry polyphenol fraction (PP).** (A) Sum of mass spectra acquired from MS direct injection, showing all detected masses and their abundances. (B) MS/MS fragmentation pattern of main molecular ion with  $m/z$  422.22 and annotation of released

molecular features (left) and UV-vis spectra from 220-640 nm (right). (C) UV chromatogram at 515 nm (top) and 280 nm (middle); and extracted ion chromatogram (EIC) for  $m/z$  422.22 generated for the *polyphenol* fraction resulted in two peaks at 4.10 and 4.43 minutes (bottom). (D) UV chromatogram at 280 nm and extracted ion chromatogram for  $m/z$  422.22 generated for the *raw juice* fraction also resulted in two peaks at 4.10 and 4.43 minutes. (E) Sum of mass spectra acquired from MS direct injection of the *raw juice* fraction revealed  $m/z$  422.22 as a major molecular ion.

**Table S1:** Anthocyanin and sugar concentration before and after chromatographic separation of blackberry juice. n.d. – not detectable

| Fraction                | Anthocyanin concentration<br>[ $\mu\text{g}/\mu\text{l}$ ] | Volume<br>[ml] | Total anthocyanin<br>amount [mg] | Sugar concentration [mM] |          |         |
|-------------------------|------------------------------------------------------------|----------------|----------------------------------|--------------------------|----------|---------|
|                         |                                                            |                |                                  | Glucose                  | Fructose | Sucrose |
| <i>raw juice</i>        | 0.25                                                       | 400.00         | 100.00                           | 6.61                     | 9.16     | 0.65    |
| <i>anthocyanins A1</i>  | 4.175                                                      | 12.00          | 49.99                            | n.d.                     | 0.01     | n.d.    |
| <i>anthocyanins A2</i>  | 0.17                                                       | 6.00           | 1.03                             | 0.01                     | 0.01     | n.d.    |
| <i>anthocyanins A3</i>  | 0.22                                                       | 6.00           | 1.34                             | 0.02                     | 0.01     | 0.01    |
| <i>anthocyanins A4</i>  | 0.61                                                       | 6.00           | 3.68                             | 0.03                     | 0.01     | 0.01    |
| <i>n.i. polyphenols</i> | 0.76                                                       | 12.60          | 9.54                             | 0.01                     | n.d.     | n.d.    |

**Figure S5**

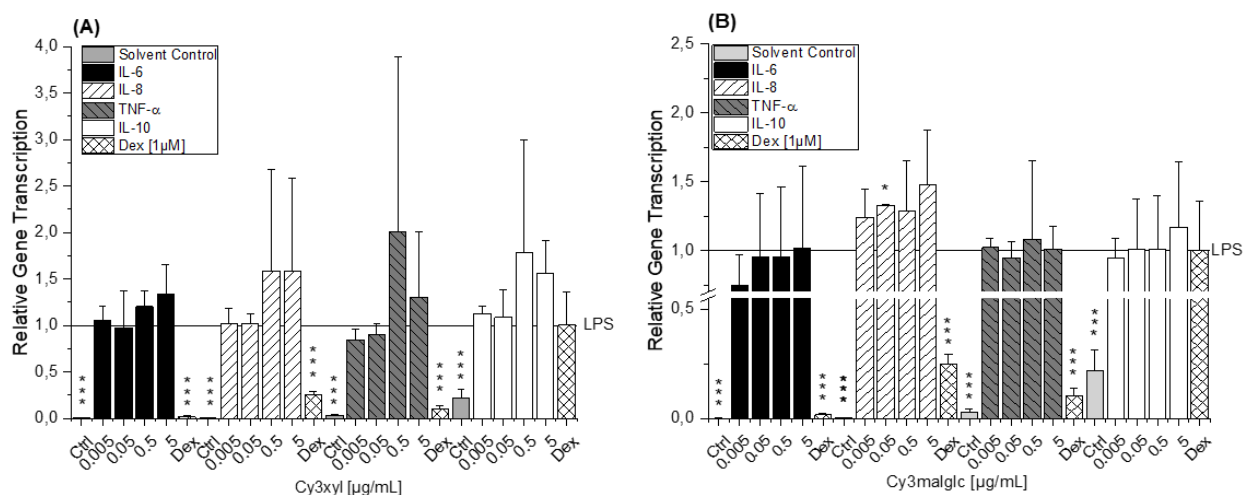

**Supplementary Figure S5:** Relative transcript levels of IL-6, IL-8 and TNF- $\alpha$  in THP-1 derived macrophages pre-incubated (2 h) with (A) Cy3xyl and (B) Cy3malglc and subsequently challenged by LPS for another 3 h. Dexamethasone (Dex; 1  $\mu\text{M}$ ) served as positive control. Cy3xyl = cyanidin-3O-xyloside; Cy3malglc = cyanidin-3O-(6''-malonylglucoside). Values shown are the means + SD of at least three independent experiments presented as relative gene transcription, normalized to  $\beta$ -Actin and GAPDH and compared to LPS stimulated cells (calibrator,  $y=1$ ). Significant differences among the test concentrations were calculated by one-way ANOVA ( $p < 0.05$ , a-c). Statistical differences compared to the LPS stimulus were calculated with a one-sample  $t$ -test (\* $p$ , \*\* $p$ , \*\*\* $p < 0.05$ , 0.01, 0.001).

**Figure S6**

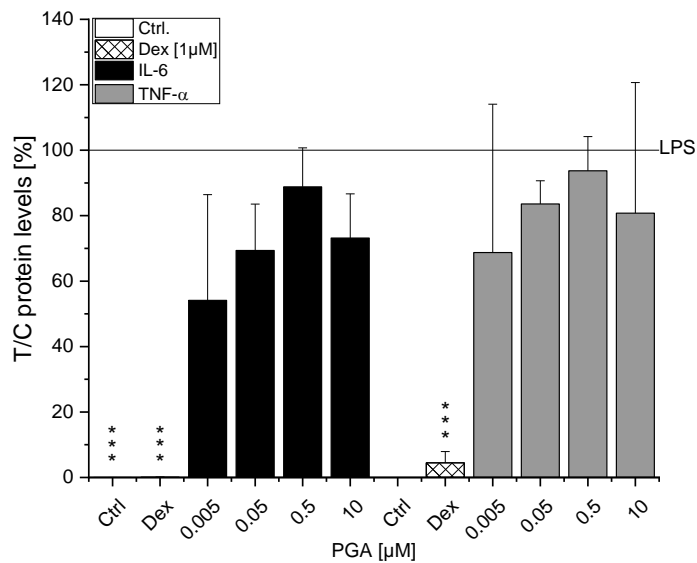

**Supplementary Figure S6:** Release of IL-6 and TNF- $\alpha$  from THP-1 derived macrophages pre-incubated (2 h) with PGA and subsequently additionally challenged by LPS for another 18 h. Dexamethasone (Dex; 1  $\mu$ M) served as positive control. Values plotted are the mean + SD of three independent experiments and presented as test over control compared to LPS stimulated cells. Significant differences among the test concentrations were calculated with one-way ANOVA ( $p < 0.05$ , a-c). Statistical differences compared to the LPS stimulus were calculated with a one-sample t-test (\* $p$ , \*\* $p$ , \*\*\* $p < 0.05$ , 0.01, 0.001). No statistical evaluation could be performed for the TNF- $\alpha$  solvent control since measured levels equaled 0 ng/ $\mu$ L.

**Figure S7**

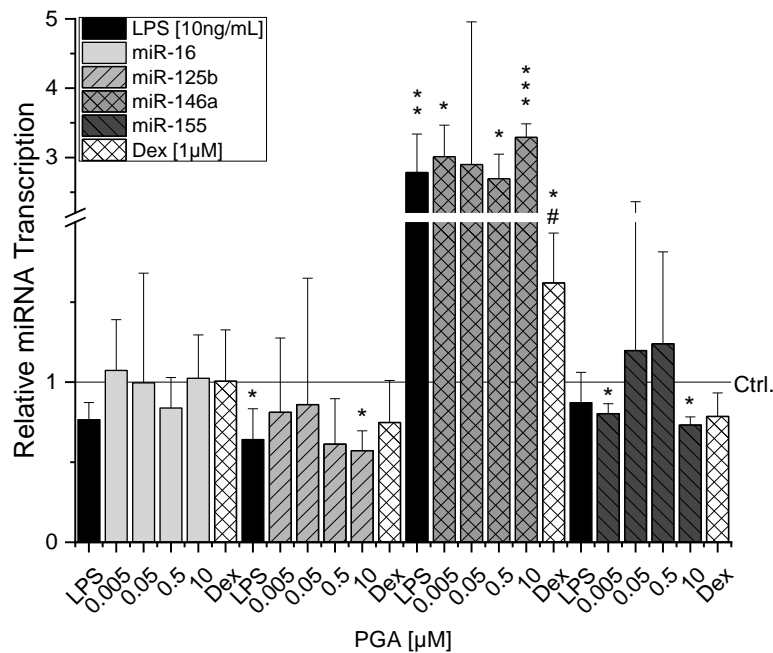

**Supplementary Figure S7:** miRNA levels of miR-16, miR-125b, miR-146a and miR-155 in THP-1 derived macrophages pre-incubated with PGA for 2 h and subsequently additionally challenged with LPS (10 ng/ml) for 18 h. Dexamethasone (Dex, 1 μM) served as a positive control. Values are the mean + SD of at least 3 independent experiments presented as relative gene transcription normalized to RNU6 and SNORD68 and compared to the solvent control (Ctrl., calibrator,  $y=1$ ). Significant differences among the test concentrations were calculated by one-way ANOVA ( $p < 0.05$ , a-e). Statistical differences compared to the solvent control or the LPS stimulus were calculated with a one-sample  $t$ -test (\* $p$ , \*\* $p$ , \*\*\* $p < 0.05$ , 0.01, 0.001) or a two-sample  $t$ -test (# $p < 0.05$ ), respectively.
